# Supplementary material
Source: PubMed Central journal article supplement (PMC8011593)
Supplement: NIHMS1646012-supplement-Vercammen_supplementary_materials.pdf [file NIHMS1646012-supplement-Vercammen_supplementary_materials.pdf]

**Appendix**  
**Food Security and 10-Year Cardiovascular Disease Risk Among U.S. Adults**  
**Vercammen et al.**

**Appendix Table 1.** ORs (95% CI) for Association Between Food Security and 10-year CVD Risk  $\geq 20\%$ , Using the Revised Pooled Cohort Equations

| <b>Variable</b>           | <b>Food security</b> | <b>Marginal food security</b> | <b>Low food security</b> | <b>Very low food security</b> |
|---------------------------|----------------------|-------------------------------|--------------------------|-------------------------------|
| <b>Total</b>              |                      |                               |                          |                               |
| High risk ( $\geq 20\%$ ) | n=273                | n=53                          | n=36                     | n=31                          |
| Low risk ( $< 20\%$ )     | n=5,083              | n=746                         | n=627                    | n=491                         |
| Model 1                   | ref                  | <b>2.31 (1.56, 3.43)</b>      | 1.60 (0.92, 2.77)        | <b>5.14 (2.23, 11.85)</b>     |
| Model 2                   | ref                  | <b>2.42 (1.65, 3.57)</b>      | 1.48 (0.83, 2.65)        | <b>5.50 (2.29, 13.23)</b>     |
| Model 3                   | ref                  | <b>1.57 (1.01, 2.45)</b>      | 0.94 (0.50, 1.77)        | <b>3.12 (1.50, 6.53)</b>      |
| <b>Males</b>              |                      |                               |                          |                               |
| Model 1                   | ref                  | <b>2.80 (1.64, 4.78)</b>      | 1.61 (0.74, 3.49)        | <b>6.13 (1.88, 19.98)</b>     |
| Model 2                   | ref                  | <b>2.78 (1.66, 4.65)</b>      | 1.57 (0.72, 3.41)        | <b>5.95 (1.68, 21.08)</b>     |
| Model 3                   | ref                  | 1.53 (0.84, 2.79)             | 0.94 (0.40, 2.21)        | <b>3.08 (1.19, 7.93)</b>      |
| <b>Females</b>            |                      |                               |                          |                               |
| Model 1                   | ref                  | 2.04 (0.75, 5.50)             | 1.49 (0.50, 4.43)        | <b>5.15 (2.66, 9.95)</b>      |
| Model 2                   | ref                  | 1.75 (0.65, 4.76)             | 1.31 (0.47, 3.65)        | <b>4.83 (2.32, 10.08)</b>     |
| Model 3                   | ref                  | 1.88 (0.63, 5.67)             | 0.94 (0.30, 2.93)        | <b>3.44 (1.19, 9.93)</b>      |

*Notes:* Model 1 is adjusted for age. Model 2 is adjusted for age, sex (except for sex-specific models) and race/ethnicity. Model 3 is adjusted for age, sex (except for sex-specific models), race/ethnicity, education, marital status, household income, household SNAP participation, and physical activity. Boldface indicates statistical significance ( $p < 0.05$ ).

**Appendix**  
**Food Security and 10-Year Cardiovascular Disease Risk Among U.S. Adults**  
**Vercammen et al.**

**Appendix Figure 1.** Flowchart of participant inclusion/exclusion in analytic sample.

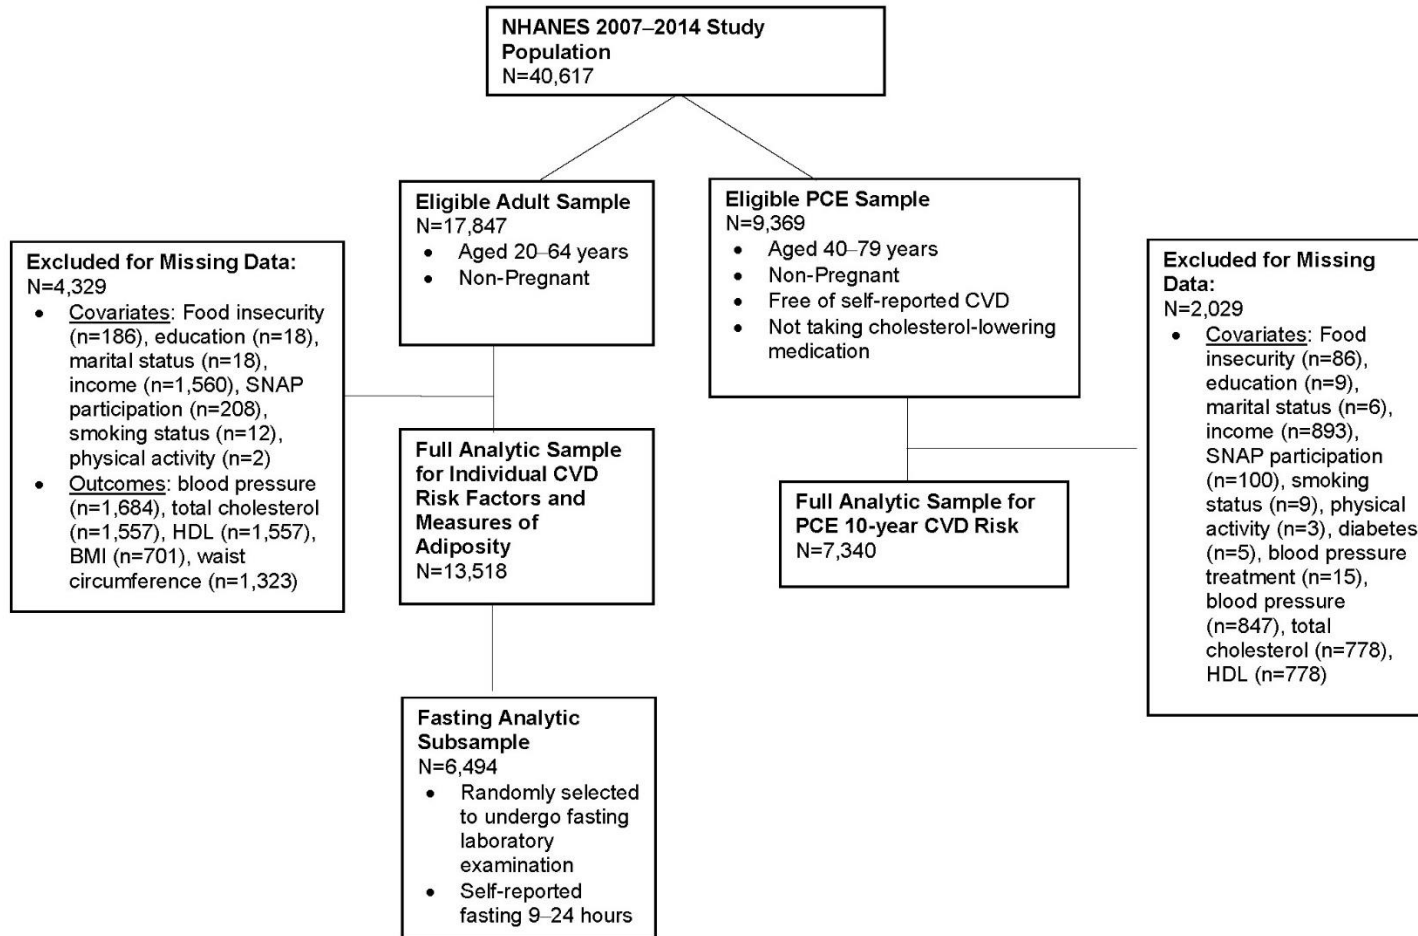

NHANES, National Health and Nutrition Examination Survey; SNAP, Supplemental Nutrition Assistance Program; HDL, high-density lipoprotein cholesterol ; PCE, Pooled Cohort Equations; CVD, cardiovascular disease.
